# Supplementary material for: Design of Heusler Precipitation Strengthened NiTi- and PdTi-Base SMAs for Cyclic Performance
Source: Springer Nature journal article supplement (doi:10.1007/s40830-015-0017-0), 2015-06-01
Supplement: MOESM1 [file 11853854]

Electronic Supplementary Material

Table A . Experimentally measured Af temperatures from prototype alloys (nominal composition given). Sources: 1. New data 2. [20] 3. [4] 4. [19].

| Sublattice I | | | |  | Sublattice II | | |  | Measured  Af (°C) | Source |
| --- | --- | --- | --- | --- | --- | --- | --- | --- | --- | --- |
| Pd | **Ni** | **Fe** | **Al** |  | **Ti** | **Zr** | **Al** |  |
| 34.5 | 0 | 15.5 | 0 |  | 50 | 0 | 0 |  | -11.35 | 1 |
| 42.2 | 0 | 7.8 | 0 |  | 46 | 0 | 4 |  | 142.45 | 1 |
| 42.2 | 0 | 7.8 | 0 |  | 44 | 0 | 6 |  | 47.88 | 1 |
| 41.8 | 0 | 8.2 | 0 |  | 44 | 0 | 6 |  | 34.25 | 1 |
| 41.4 | 0 | 8.6 | 0 |  | 44 | 0 | 6 |  | 16.325 | 1 |
| 0 | 48 | 0 | 2 |  | 41 | 9 | 0 |  | 65.37 | 1 |
| 0 | 47.5 | 0 | 2.5 |  | 38.2 | 11.8 | 0 |  | 55.33 | 1 |
| 0 | 47 | 0 | 3 |  | 35.8 | 14.2 | 0 |  | 61.63 | 1 |
| 0 | 48 | 0 | 2 |  | 35 | 15 | 0 |  | 106 | 2 |
| 0 | 47 | 0 | 3 |  | 30 | 20 | 0 |  | 143 | 2 |
| 0 | 46 | 0 | 4 |  | 28 | 22 | 0 |  | 141 | 2 |
| 50 | 0 | 0 | 0 |  | 41 | 5 | 4 |  | 327.37 | 1 |
| 45 | 5 | 0 | 0 |  | 41 | 5 | 4 |  | 190.72 | 1 |
| 50 | 0 | 0 | 0 |  | 39 | 5 | 6 |  | 211.55 | 1 |
| 20 | 30 | 0 | 0 |  | 49 | 0 | 1 |  | 74 | 3 |
| 25 | 25 | 0 | 0 |  | 49 | 0 | 1 |  | 147 | 3 |
| 25 | 25 | 0 | 0 |  | 47 | 0 | 3 |  | -10 | 3 |
| 27 | 23 | 0 | 0 |  | 47 | 0 | 3 |  | 37 | 3 |
| 30 | 20 | 0 | 0 |  | 47 | 0 | 3 |  | 123 | 3 |
| 36 | 14 | 0 | 0 |  | 46 | 0 | 4 |  | 134 | 3 |
| 32.5 | 17.5 | 0 | 0 |  | 46 | 0 | 4 |  | 95 | 3 |
| 38.5 | 11.5 | 0 | 0 |  | 44 | 0 | 6 |  | 88.37 | 2 |
| 25 | 25 | 0 | 0 |  | 49 | 0 | 1 |  | 145 | 4 |
| 25 | 25 | 0 | 0 |  | 47 | 0 | 3 |  | -10 | 4 |
